# Supplementary material
Source: Research Square preprint supplement (doi:10.21203/rs.3.rs-9020528/v1)
Supplement: Supplementary file 1 [file a726e304885369c81ca1e880.docx]

**Appendix A**

**Microsoft Forms Student Survey with Informed Consent**

**
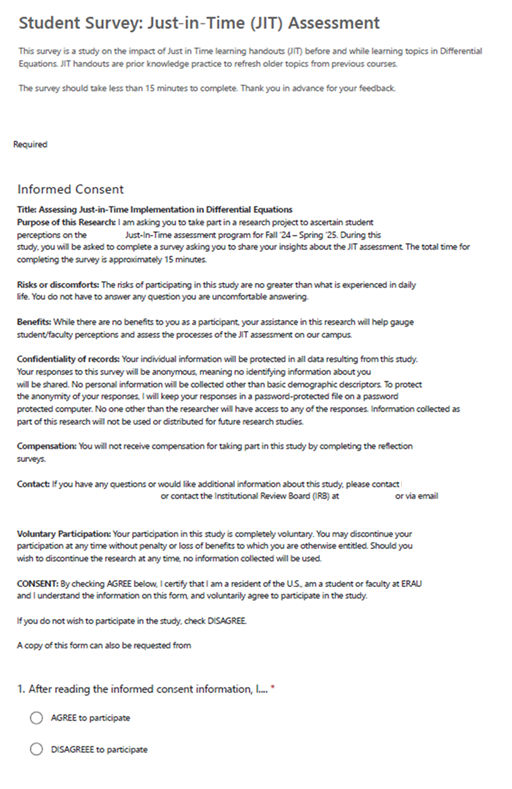
**

**Continued**


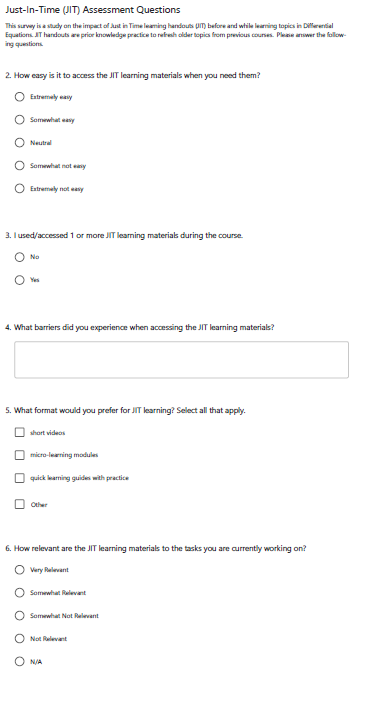


**Continued**


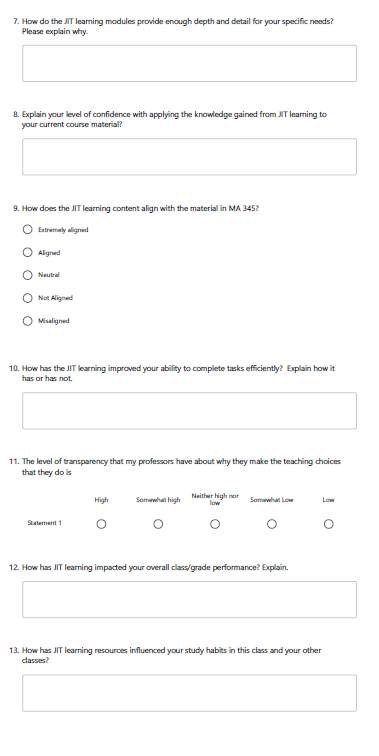


**Continued**


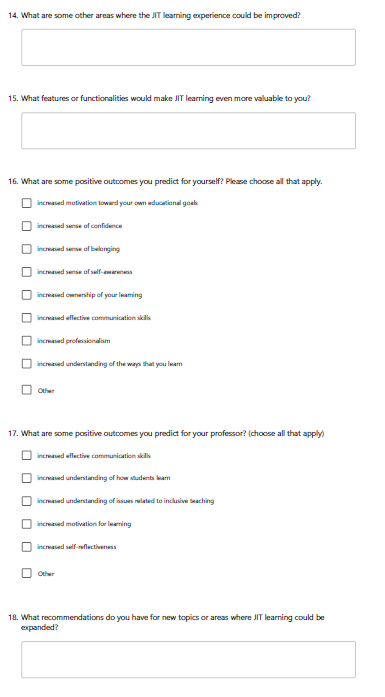


**Continued**


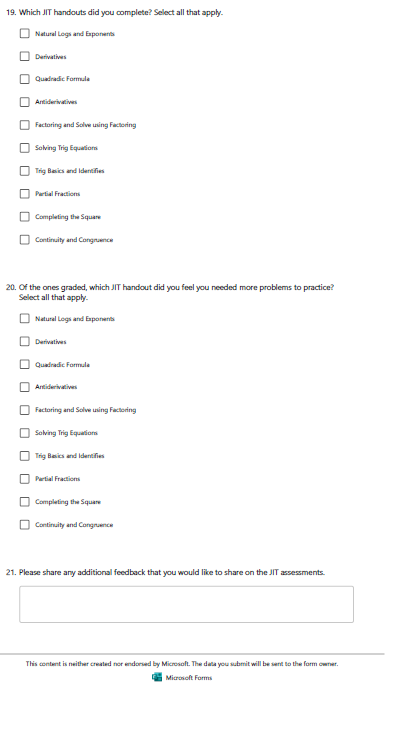


**Appendix B**

**Canvas End of the Course Evaluation Questions Spring 2025**

- 1. 1) Did you participate in 1 or more JIT bonuses?
  2. Yes (go to question 2a link)
  3. No (go to question 2b link)
  4. 2) Divided question parts
  5. a) How did JIT resources influence your study habits? [blank space to type]

b) Why did you not participate in 1 or more JOT bonuses? Please check all that apply.

- I did not have enough time.
- I did not want to do them.
- I didn’t think they would benefit me.
- I already knew the material.
- Other, please explain:
